# Supplementary material
Source: Elsevier journal article supplement (https://www.sciencedirect.com/science/article/pii/S0213005X18302799)

## SUPPLEMENTARY MATERIAL

Figure 1s. Prevalence of risk factors according to age.

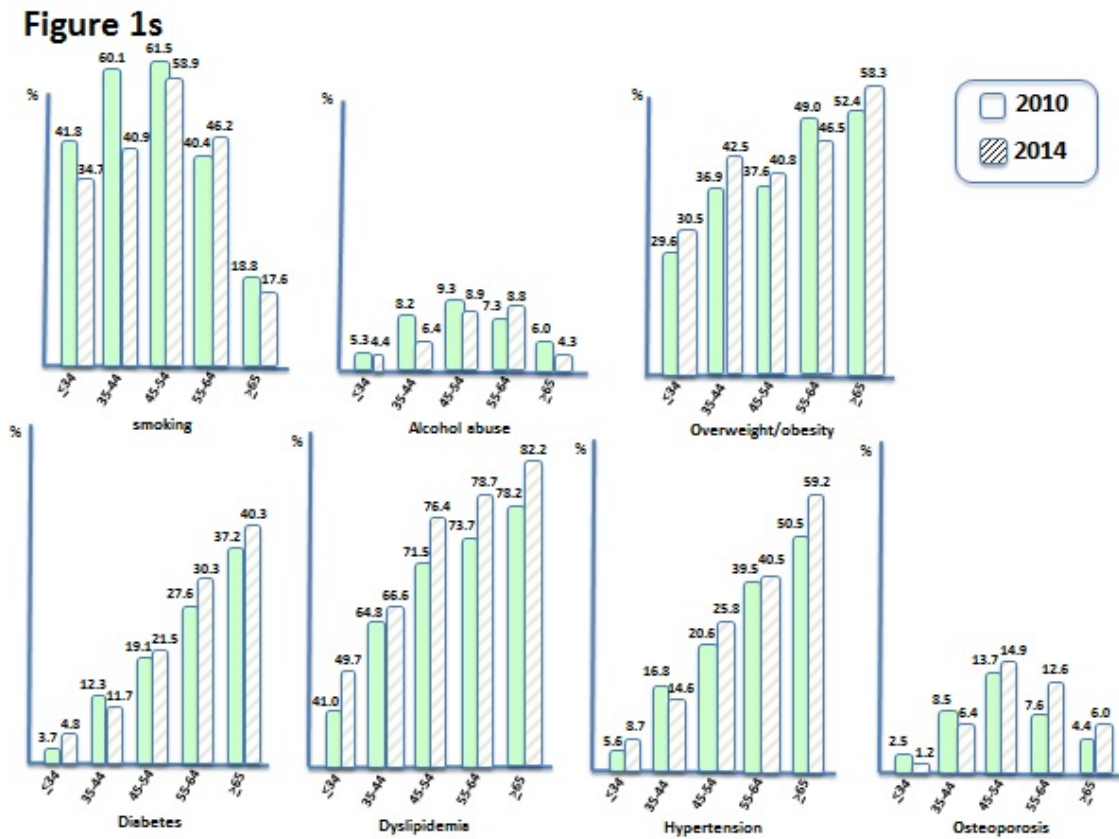

Figure 2s. Framingham coronary heart risk score according to age.

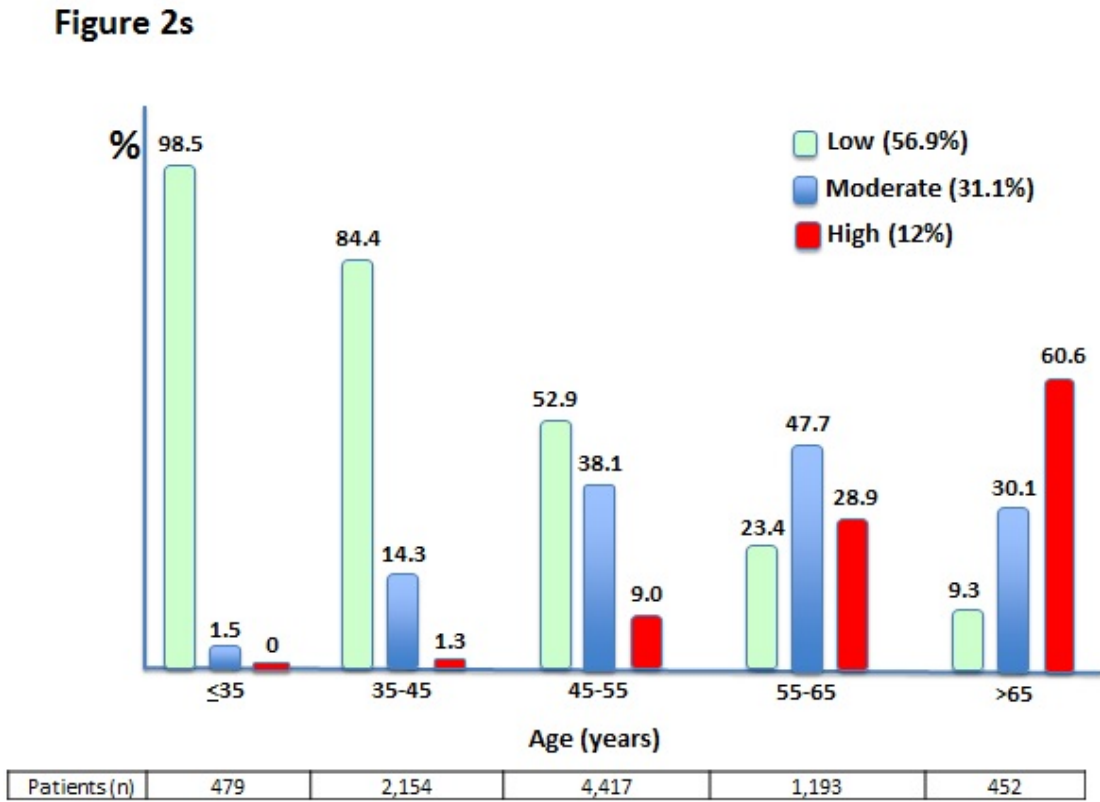

Figure 3s. D:A:D renal risk score according to age.

**Figure 3s**

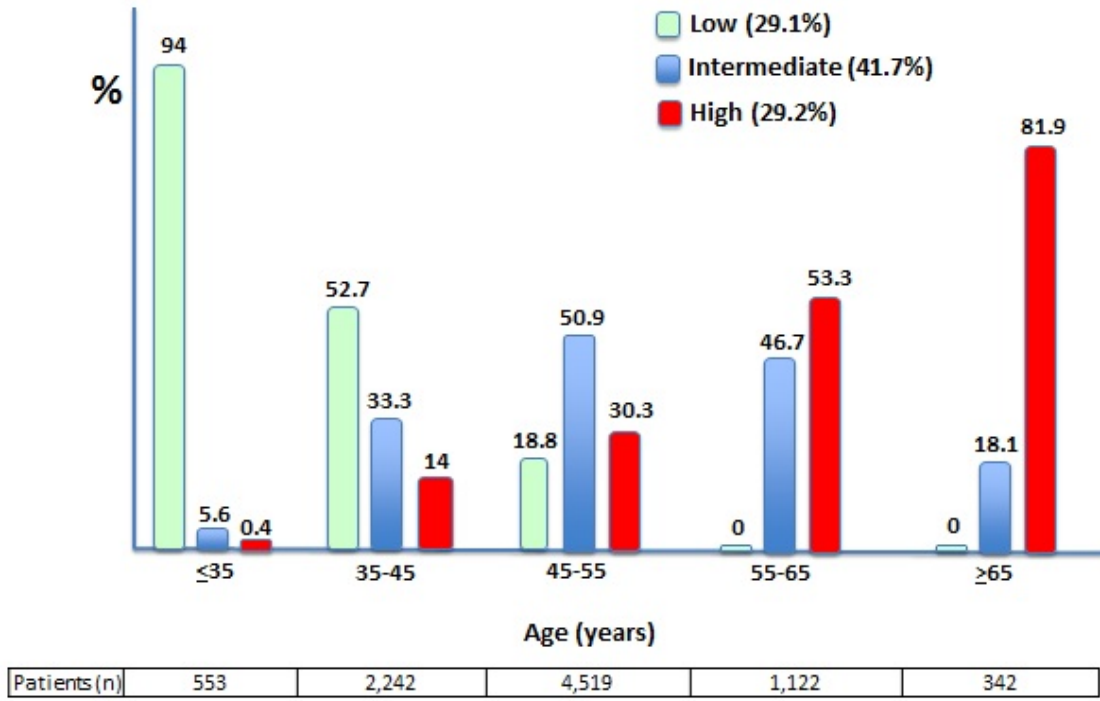

Supplement: mmc1 [file S0213005X18302799:mmc1.pdf]
